# Supplementary material for: Local hippocampal fast gamma rhythms precede brain-wide hyperemic patterns during spontaneous rodent REM sleep
Source: PubMed Central journal article supplement (PMC6299136; doi:10.1038/s41467-018-07752-3), 2018-12-18
Supplement: 41467_2018_7752_MOESM2_ESM.pdf [file 41467_2018_7752_MOESM2_ESM.pdf]

**Local hippocampal fast gamma rhythms precede brain-wide hyperemic  
patterns during spontaneous rodent REM sleep**

A. Bergel et al.

Supplementary Material

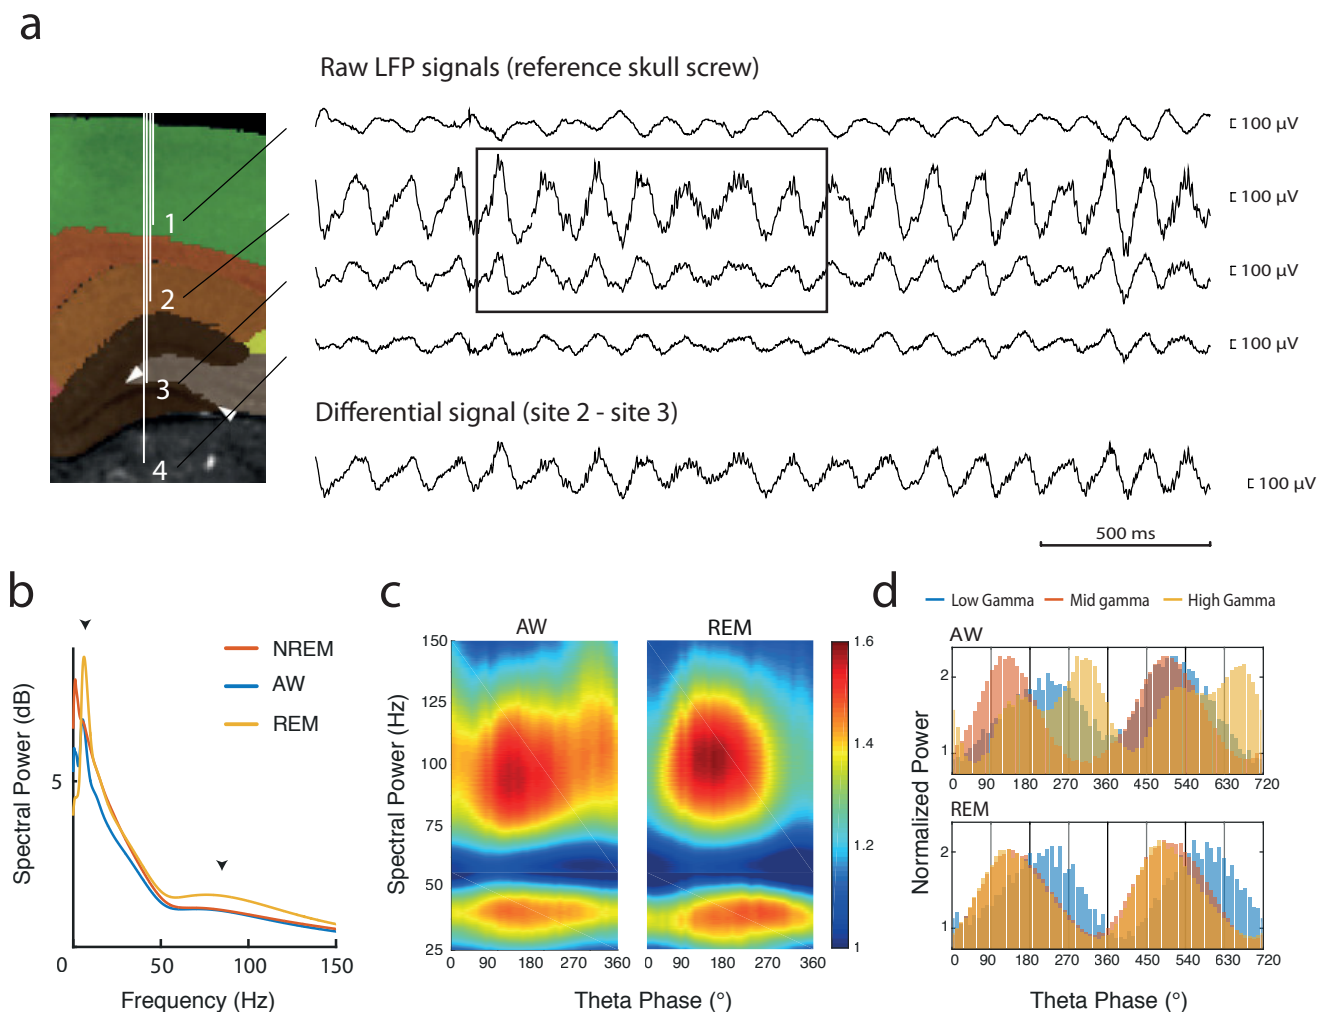

### Supplementary Figure 1: Electrophysiological recordings in the dorsal hippocampus

(a) Electrodes bundles (white) overlaid on the Waxholm Atlas of the Rat Brain at Bregma = - 4.0 mm. Adapted from reference <sup>1</sup>, Copyright (2015), with permission from Elsevier. Targeted structures are parietal association cortex (Green - 1), CA1 region (Light Brown - 2), dentate gyrus (Dark Brown - 3) and dorsal thalamus (Grey contrast - 4). Details of REM theta oscillations for raw LFP traces at each recording site. We computed differential signals between CA1 and dentate recording sites to obtain the best signal to noise ratio.

(b) Average power spectral density for the differential signal shown in (a). REMS is characterized by sustained power in the theta and mid gamma bands (arrows). AW is characterized by theta power while NREM shows stronger activity in the delta band (1-4 Hz) and flat distribution over other frequency bands.

(c) Wavelet based theta-phase spectrogram showing 3 different gamma sub-bands during AW and two different gamma sub-bands during REM sleep<sup>2</sup>.

(d) Low-Gamma (20-50 Hz) Mid-Gamma (50-100 Hz) and High-Gamma (100-150) Hz power show theta phase modulation between AW and REM. Note the 90 $^{\circ}$ -shift between slow gamma and mid-gamma power peaks. High-gamma during AW shows two distinct peaks around theta peak (180 $^{\circ}$ ) and theta trough (0 $^{\circ}$ ).

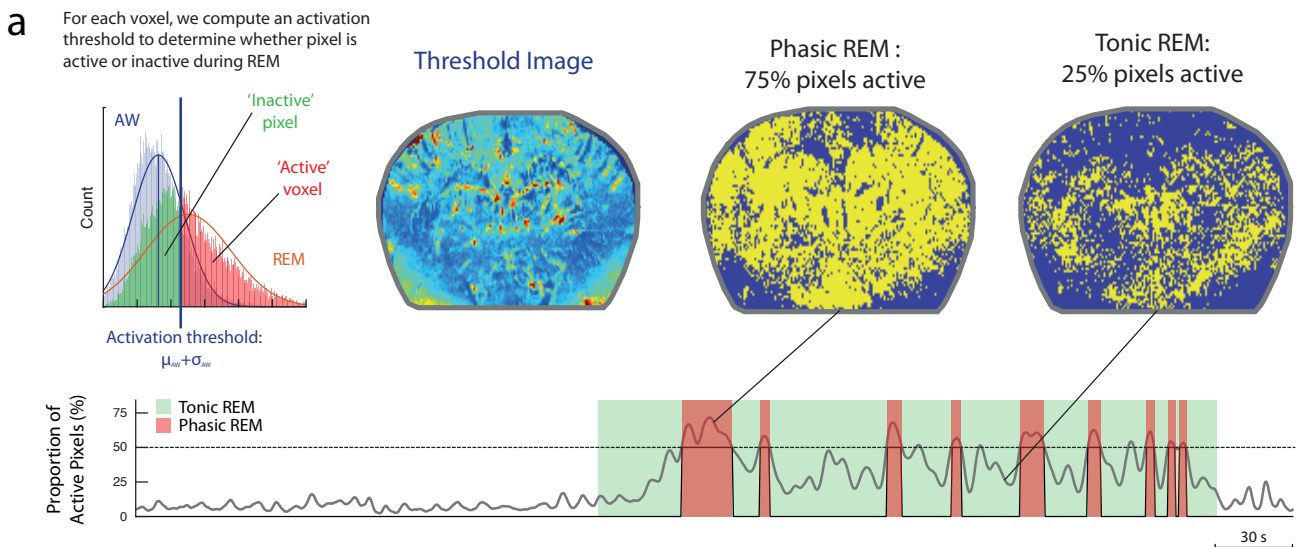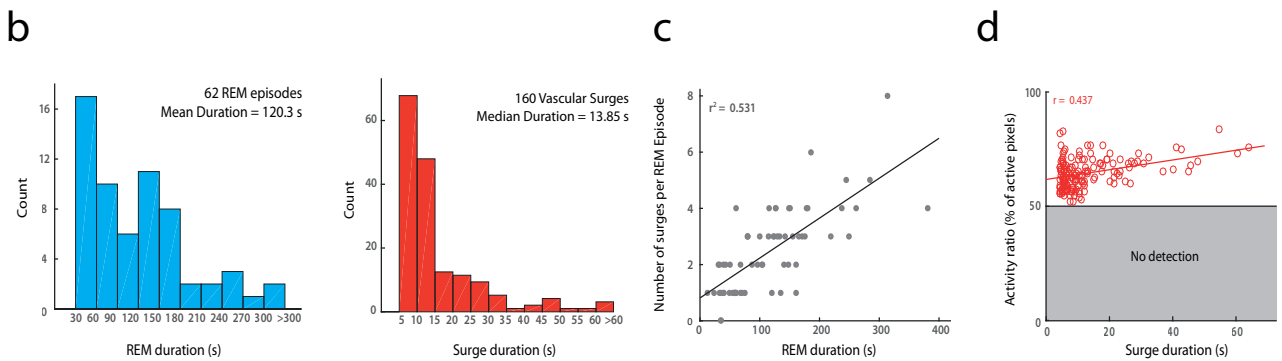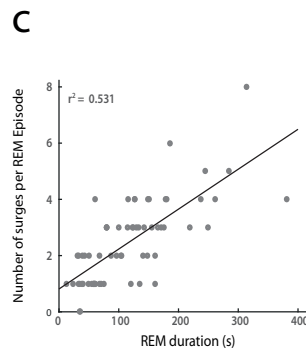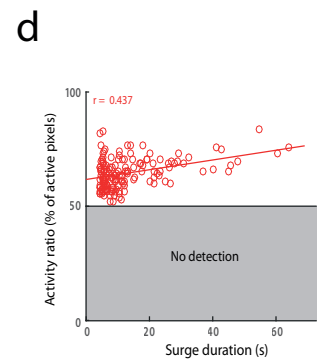

## Supplementary Figure 2: Details of phasic/tonic REM sleep classification

(a) Phasic REM epochs (vascular surges) are detected by first extracting AW distributions for each pixel in an image and computing the mean  $\mu$  and standard deviation  $\sigma$ . A threshold image is formed by computing  $\mu + p\sigma$  for each pixel, where  $p$  is the first parameter (activation threshold). A pixel is thus considered active if the CBV level is above activation threshold. A second parameter  $m$ , the extent threshold, is set as the minimum proportion of active pixels over the total number of brain pixels, to discriminate between phasic and tonic regimes. We typically used  $p=1$  and  $m=0.5$ . We show two typical images during phasic and tonic REM with active pixels in yellow and silent pixels in blue.

(b) REM episodes and surges distributions for all recordings (7 animals), for a total of 62 REM episodes and 160 vascular surges.

(c) Relationship between REM episode duration and the number of surges per episode, showing a clear positive correlation.

(d) Relationship between surge extent (the maximum proportion of active pixels during a surge) and surge duration. Weak correlation between these two variables, owing to the fact that short surges (<15 s) show variability in surge extent.

a

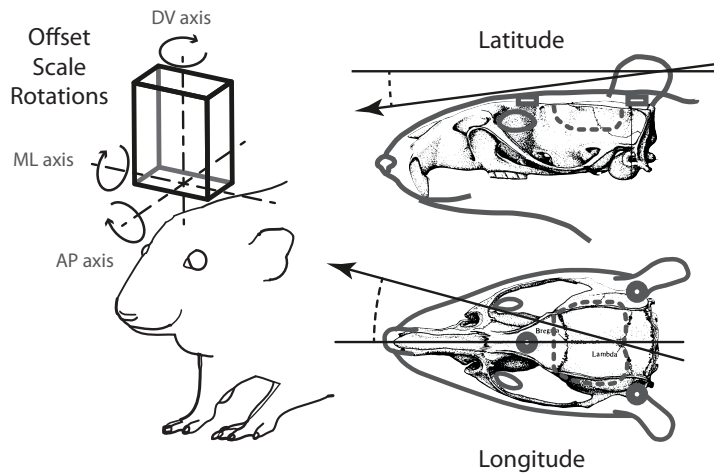

b

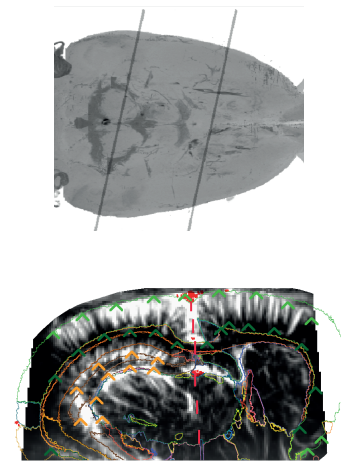

c

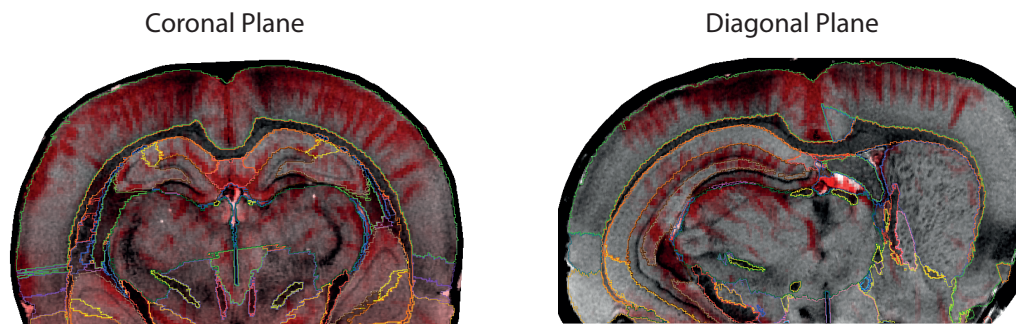

### Supplementary Figure 3: Waxholm-based atlas registration of vascular planes

(a) Atlas registration of vascular images is performed by finding the physical parameters of probe and probe holder orientation to acquire vascular planes. We listed 3 parameters for each axis (1 rotation, 1 offset value and 1 scaling value). In multi-plane recordings, we added 2 angles (latitude and longitude) corresponding to the probe holder axis and 2 values (offset and scale) corresponding to consecutive-plane spacing. Adapted from reference <sup>3</sup>, Copyright (1985), with permission from Elsevier.

(b) Top - Example of two diagonal planes superimposed on volumetric data. Bottom - We labeled vascular images with anatomically-salient landmarks including outer cortex edge (dark green), inner cortex edge (light green), dentate gyrus edge (orange) and brain mid-plane axis (red). These landmarks are used to minimize a global mean-square error between landmarks and corresponding region edge.

(c) Our algorithm allows for registration of any vascular plane onto Waxholm atlas<sup>4</sup>. We give two resulting registrations for a coronal plane (left) and a diagonal plane including whole hippocampus (right).

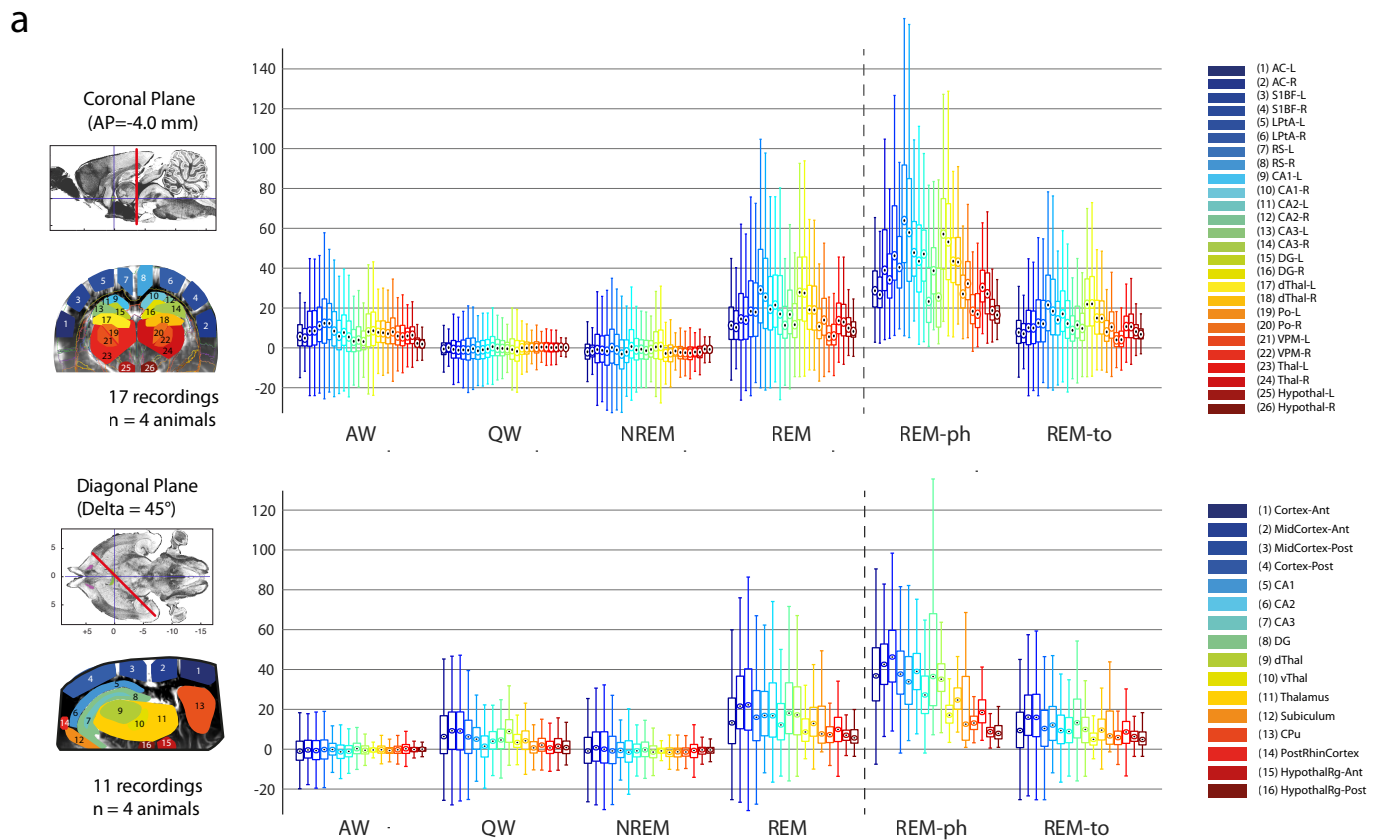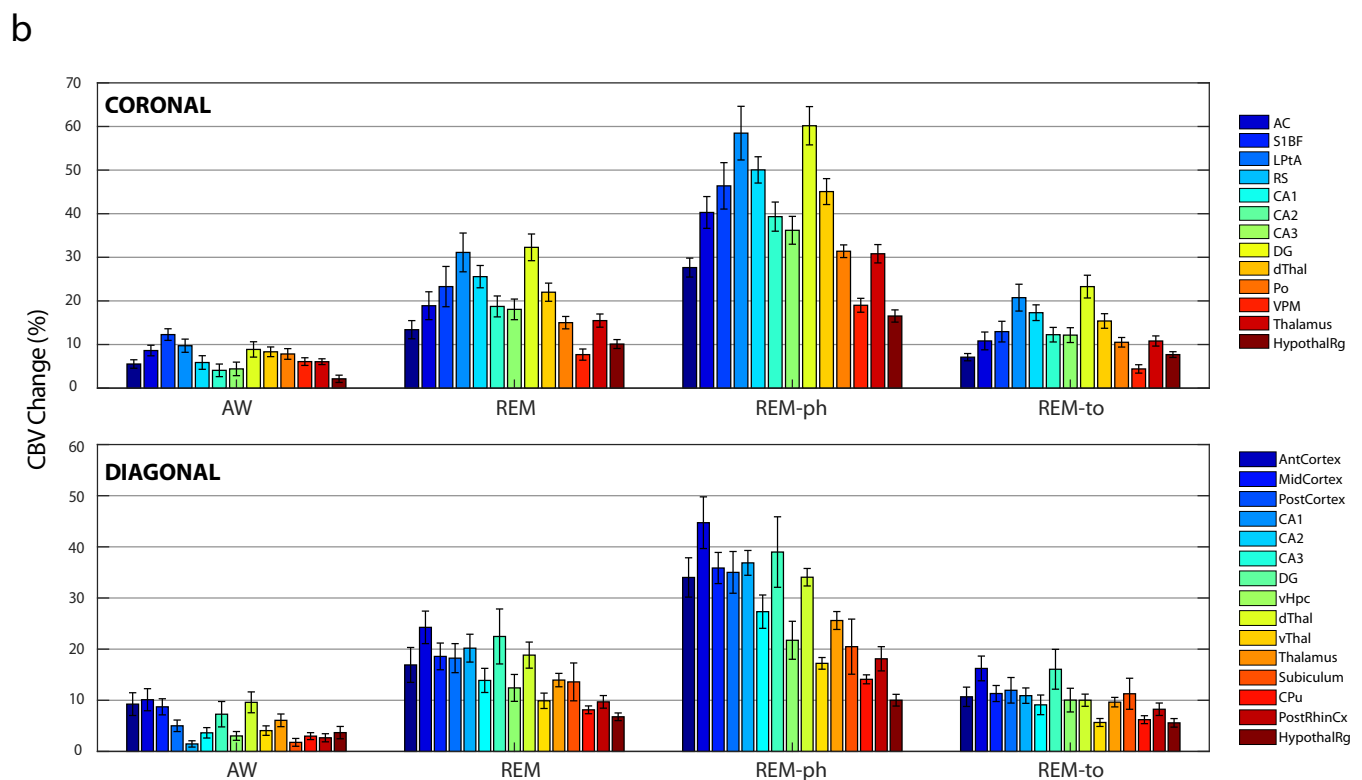

### Supplementary Figure 4: Details of vascular amplification during REMS

(a) Whisker plot distributions of regional CBV averages for one coronal plane (AP = -4.0 mm, 17 recordings, 4 animals) and one diagonal plane (45° rotation along dorso-ventral axis, 11 recordings, 4 animals), for all 4 periods described previously. REM sleep is divided in phasic (REM-ph) and tonic (REM-to) vascular. Note that both REM and REM-ph distributions are consistently separated from AW distribution. Left panels adapted from reference <sup>4</sup>, Copyright (2014), with permission from Elsevier.

(b) Details of mean vascular amplification (Figure 2C) for all regions and recordings along the typical coronal (Top) and diagonal planes (Bottom). Error bars show standard-error of the mean.

## Cerebral Blood Volume (CBV)

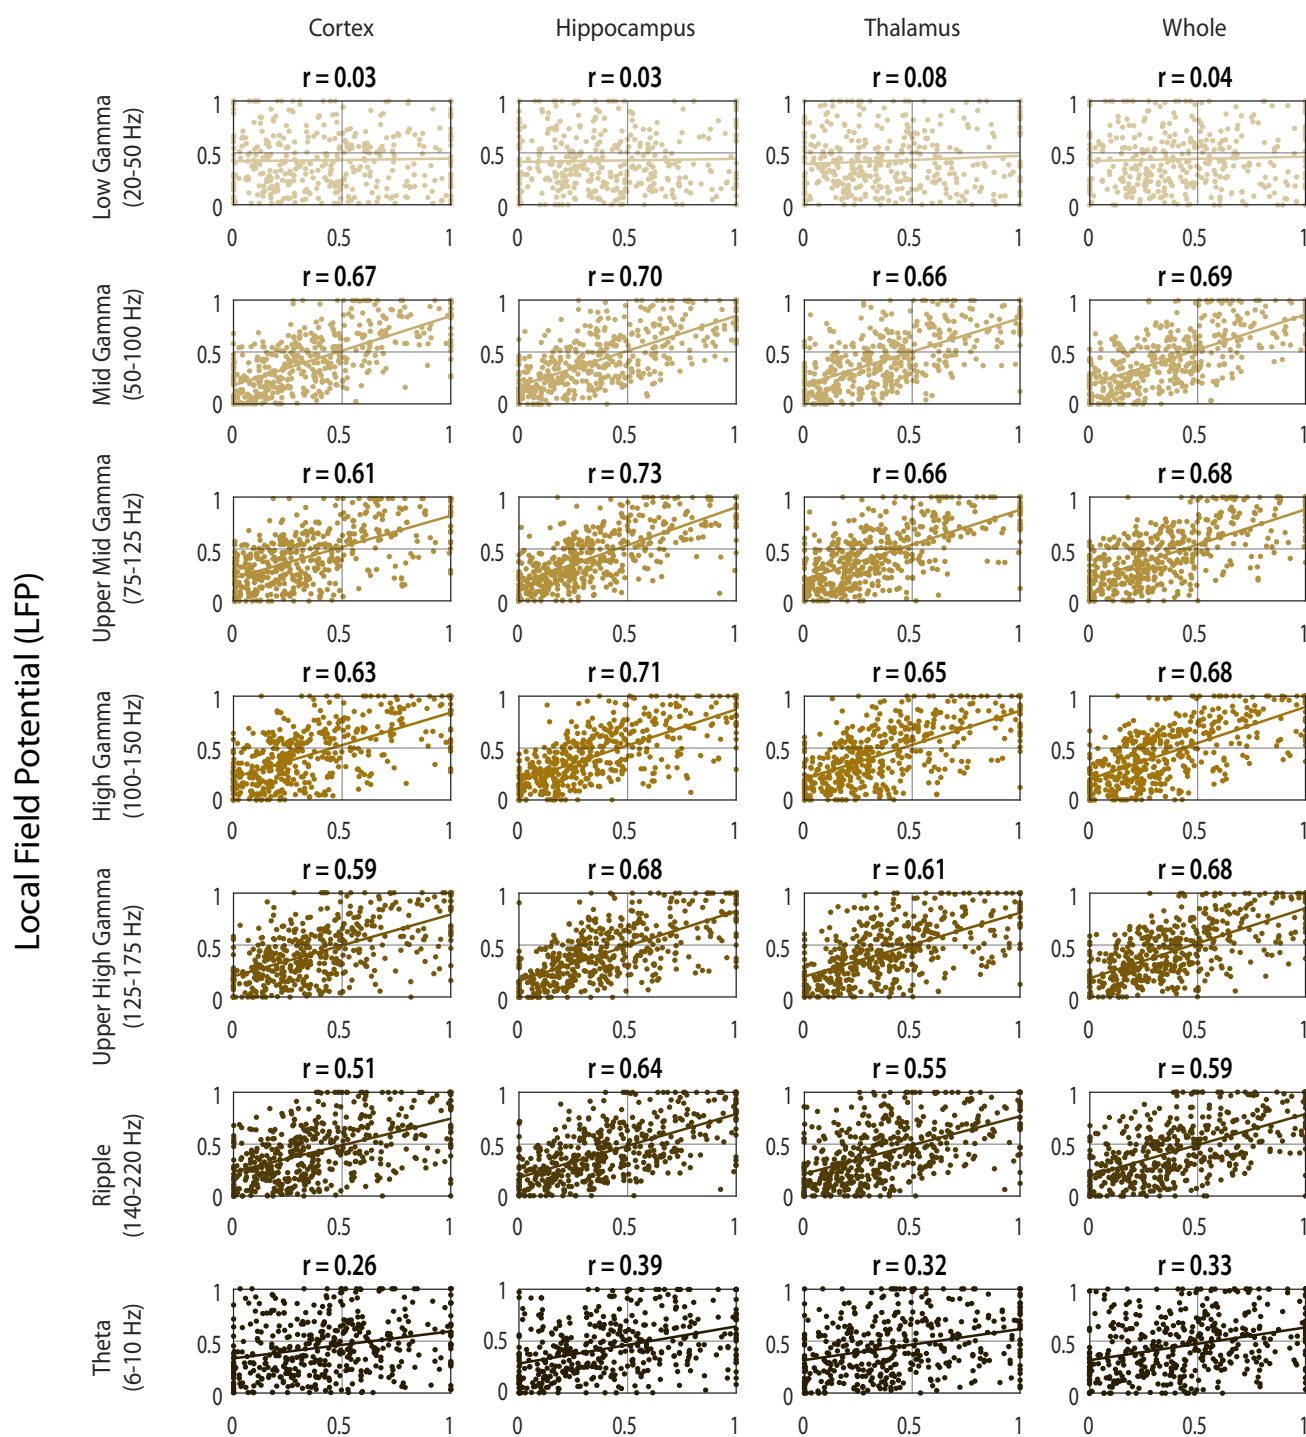

### Supplementary Figure 5: Details of CBV-LFP correlations

Details of the full LFP-CBV raster plot for all recordings as shown in Figure 3C.

We displayed four main regions including cortex, dorsal hippocampus, thalamus and whole brain. This shows that low-gamma and ripple bands poorly correlate with the vascular events observed during REM sleep, whereas theta, mid and high gamma accurately strongly correlate with vascular surge amplitude. Note that the strongest correlations are obtained for the second (or third row) and second column, that is when comparing LFP fast gamma oscillations and hemodynamics within the hippocampus.

## Cerebral Blood Volume (CBV)

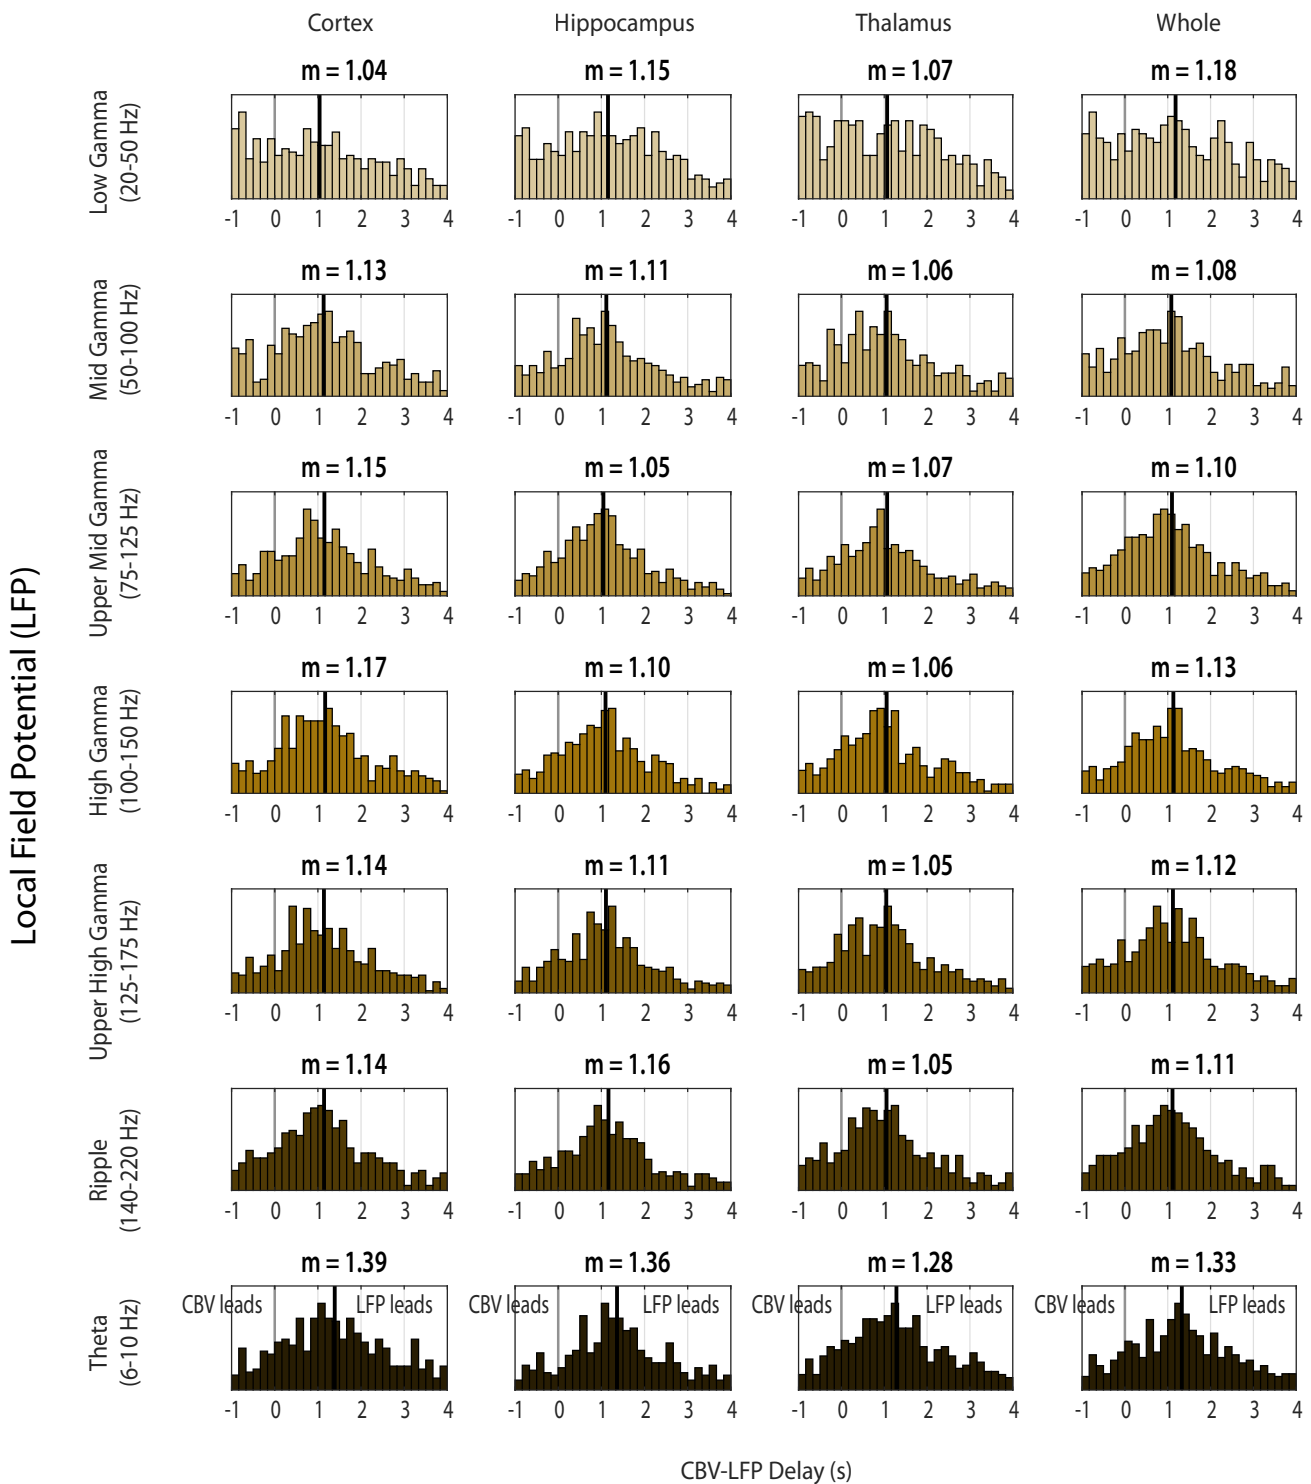

### Supplementary Figure 6: Details of CBV-LFP delays

Details of the full LFP-CBV delay histograms for all recordings as shown in Figure 3E.

We displayed them for four main regions including cortex, dorsal hippocampus, thalamus and whole brain. This shows that the vast majority of electrophysiological events occur before vascular surges (all timing distributions are skewed towards positive delays, showing that LFP peaks lead CBV peaks). Apart from the low gamma band, all of these distributions show asymmetry and a clear maximum, the strongest asymmetry being observed for upper mid and high gamma bands. Note that delays differ across regions for all frequency bands, showing that vascular activity peaks earlier in the thalamus, then in the hippocampus and finally in the cortex.

| HPC - CORTEX        | QW     |       | NREM   |       |         | AW     |       |         | REM    |       |         |
|---------------------|--------|-------|--------|-------|---------|--------|-------|---------|--------|-------|---------|
| Animal              | IC_95% |       | IC_95% |       | Z_score | IC_95% |       | Z_score | IC_95% |       | Z_score |
| Rat1 (3 recordings) | 0,562  | 0,676 | 0,603  | 0,658 | 0,29    | 0,828  | 0,883 | 10,60   | 0,910  | 0,945 | 13,57   |
| Rat2 (4 recordings) | 0,716  | 0,773 | 0,608  | 0,644 | -10,05  | 0,782  | 0,830 | -0,23   | 0,787  | 0,850 | 2,77    |
| Rat3 (6 recordings) | 0,596  | 0,722 | 0,643  | 0,698 | 0,24    | 0,680  | 0,794 | 1,87    | 0,763  | 0,836 | 4,63    |
| Rat4 (3 recordings) | 0,689  | 0,754 | 0,619  | 0,649 | -5,00   | 0,673  | 0,737 | -0,83   | 0,832  | 0,889 | 6,36    |
| Average             | 0,641  | 0,731 | 0,618  | 0,662 | -3,629  | 0,741  | 0,811 | 2,852   | 0,823  | 0,880 | 6,829   |

  

| THAL-CORTEX         | QW     |       | NREM   |       |         | AW     |       |         | REM    |       |         |
|---------------------|--------|-------|--------|-------|---------|--------|-------|---------|--------|-------|---------|
| Animal              | IC_95% |       | IC_95% |       | Z_score | IC_95% |       | Z_score | IC_95% |       | Z_score |
| Rat1 (3 recordings) | 0,566  | 0,671 | 0,447  | 0,516 | -4,58   | 0,863  | 0,909 | 13,10   | 0,884  | 0,927 | 11,53   |
| Rat2 (4 recordings) | 0,745  | 0,796 | 0,519  | 0,562 | -14,83  | 0,732  | 0,783 | -0,36   | 0,850  | 0,895 | 4,16    |
| Rat3 (6 recordings) | 0,443  | 0,600 | 0,502  | 0,573 | 0,36    | 0,643  | 0,774 | 3,79    | 0,755  | 0,831 | 7,64    |
| Rat4 (3 recordings) | 0,774  | 0,825 | 0,504  | 0,540 | -15,61  | 0,825  | 0,863 | 3,27    | 0,846  | 0,899 | 4,13    |
| Average             | 0,632  | 0,723 | 0,493  | 0,548 | -8,665  | 0,766  | 0,832 | 4,950   | 0,834  | 0,888 | 6,865   |

  

| HPC-THAL            | QW     |       | NREM   |       |         | AW     |       |         | REM    |       |         |
|---------------------|--------|-------|--------|-------|---------|--------|-------|---------|--------|-------|---------|
| Animal              | IC_95% |       | IC_95% |       | Z_score | IC_95% |       | Z_score | IC_95% |       | Z_score |
| Rat1 (3 recordings) | 0,566  | 0,696 | 0,573  | 0,626 | -1,30   | 0,889  | 0,920 | 14,39   | 0,925  | 0,955 | 14,75   |
| Rat2 (4 recordings) | 0,623  | 0,701 | 0,486  | 0,530 | -8,25   | 0,749  | 0,796 | 6,24    | 0,834  | 0,883 | 9,09    |
| Rat3 (6 recordings) | 0,483  | 0,638 | 0,558  | 0,625 | 0,77    | 0,731  | 0,836 | 5,19    | 0,887  | 0,926 | 13,28   |
| Rat4 (3 recordings) | 0,618  | 0,697 | 0,498  | 0,534 | -6,62   | 0,714  | 0,770 | 3,91    | 0,906  | 0,939 | 13,45   |
| Average             | 0,573  | 0,683 | 0,529  | 0,579 | -3,846  | 0,771  | 0,831 | 7,431   | 0,888  | 0,926 | 12,644  |

**Supplementary Table 1: Inter-individual Analysis of CBV coupling strength (expressed as a correlation coefficient) across 3 main brain regions and arousal states.**

CBV levels are expressed in % of change relative to the baseline (3 first minutes of quiet wake in each recording). Z-scores refer to the distance of the corresponding distribution relative to the quiet wake.



| Neocortex    | AW     | REM    | REM-PHASIC |
|--------------|--------|--------|------------|
| Recording 1  | 3.008  | 5.848  | 30.480     |
| Recording 2  | 6.747  | 12.357 | 24.431     |
| Recording 3  | 1.986  | 11.855 | 19.502     |
| Recording 4  | 8.299  | 16.665 | 30.089     |
| Recording 5  | 4.560  | 9.267  | 27.867     |
| Recording 6  | 3.064  | 8.671  | 16.644     |
| Recording 7  | 6.645  | 40.472 | 55.500     |
| Recording 8  | 5.929  | 6.126  | 36.904     |
| Recording 9  | 4.908  | 12.154 | 24.975     |
| Recording 10 | 9.536  | 4.881  | 27.027     |
| Recording 11 | 10.300 | 29.002 | 51.724     |
| Recording 12 | 5.541  | 29.442 | 43.963     |
| Recording 13 | 10.192 | 24.062 | 29.846     |
| Recording 14 | 0.581  | 4.834  | 12.703     |
| Recording 15 | 23.219 | 14.614 | 29.310     |
| Recording 16 | 13.910 | 11.204 | 27.794     |
| Recording 17 | 15.294 | 20.424 | 38.611     |
| Mean         | 7.866  | 15.405 | 31.022     |
| Sem          | 1.366  | 2.460  | 2.768      |

| dHippocampus | AW     | REM    | REM-PHASIC |
|--------------|--------|--------|------------|
| Recording 1  | 9.626  | 20.219 | 61.639     |
| Recording 2  | 12.271 | 42.276 | 79.990     |
| Recording 3  | 11.674 | 34.675 | 52.483     |
| Recording 4  | 4.449  | 22.730 | 42.149     |
| Recording 5  | 4.059  | 13.557 | 37.748     |
| Recording 6  | 2.997  | 18.694 | 33.775     |
| Recording 7  | 3.785  | 45.041 | 55.815     |
| Recording 8  | -1.773 | 12.476 | 55.134     |
| Recording 9  | 2.193  | 16.104 | 33.584     |
| Recording 10 | 8.131  | 15.183 | 51.607     |
| Recording 11 | 15.813 | 40.818 | 69.387     |
| Recording 12 | -0.833 | 30.338 | 44.647     |
| Recording 13 | -0.930 | 23.779 | 29.651     |
| Recording 14 | 7.464  | 28.564 | 58.568     |
| Recording 15 | 13.048 | 33.280 | 67.641     |
| Recording 16 | 6.495  | 27.676 | 60.302     |
| Recording 17 | 17.993 | 31.303 | 60.785     |
| Mean         | 6.851  | 26.865 | 52.641     |
| Sem          | 1.433  | 2.481  | 3.406      |

| dThalamus    | AW     | REM    | REM-PHASIC |
|--------------|--------|--------|------------|
| Recording 1  | 8.762  | 18.316 | 54.941     |
| Recording 2  | 12.917 | 32.557 | 68.798     |
| Recording 3  | 8.731  | 30.543 | 43.434     |
| Recording 4  | 7.155  | 31.203 | 51.625     |
| Recording 5  | 6.231  | 19.837 | 45.270     |
| Recording 6  | 11.328 | 23.178 | 38.810     |
| Recording 7  | -0.865 | 31.003 | 39.728     |
| Recording 8  | 5.324  | 11.412 | 52.606     |
| Recording 9  | 0.688  | 6.427  | 18.130     |
| Recording 10 | 5.541  | 8.922  | 32.888     |
| Recording 11 | 16.986 | 33.620 | 63.447     |
| Recording 12 | 8.884  | 25.773 | 36.119     |
| Recording 13 | NaN    | NaN    | NaN        |
| Recording 14 | 8.584  | 21.206 | 41.168     |
| Recording 15 | 11.014 | 20.181 | 47.593     |
| Recording 16 | 7.629  | 14.573 | 36.244     |
| Recording 17 | 14.391 | 23.215 | 50.378     |
| Mean         | 8.331  | 21.998 | 45.074     |
| Sem          | 1.113  | 2.082  | 2.971      |

| Whole        | AW     | REM    | REM-PHASIC |
|--------------|--------|--------|------------|
| Recording 1  | 6.115  | 12.676 | 38.490     |
| Recording 2  | 9.142  | 23.423 | 48.499     |
| Recording 3  | 7.266  | 25.292 | 36.109     |
| Recording 4  | 7.079  | 21.505 | 34.782     |
| Recording 5  | 5.924  | 14.021 | 35.191     |
| Recording 6  | 7.921  | 16.650 | 27.663     |
| Recording 7  | 1.470  | 22.758 | 28.214     |
| Recording 8  | 6.403  | 8.443  | 36.215     |
| Recording 9  | 0.571  | 5.848  | 14.317     |
| Recording 10 | 5.075  | 7.187  | 27.455     |
| Recording 11 | 10.678 | 22.455 | 40.694     |
| Recording 12 | 6.087  | 20.971 | 29.032     |
| Recording 13 | 4.263  | 13.029 | 15.818     |
| Recording 14 | 2.579  | 9.738  | 22.278     |
| Recording 15 | 6.656  | 13.296 | 30.826     |
| Recording 16 | 5.901  | 10.121 | 24.893     |
| Recording 17 | 9.927  | 15.877 | 33.400     |
| Mean         | 6.062  | 15.488 | 30.816     |
| Sem          | 0.664  | 1.513  | 2.104      |

**Supplementary Table 2: Details of vascular amplification for all coronal recordings**

For each recording, we computed the average CBV level in four regions including neocortex, dorsal hippocampus, dorsal thalamus and whole thalamus. The values displayed in Fig. 2C are extracted from these tables. CBV units are given in % of change relative to the baseline.

| Neocortex    | AW     | REM    | REM-PHASIC |
|--------------|--------|--------|------------|
| Recording 1  | 1.513  | 13.099 | 21.718     |
| Recording 2  | 3.559  | 8.776  | 23.555     |
| Recording 3  | 5.781  | 2.401  | 16.370     |
| Recording 4  | 2.184  | 25.775 | 35.493     |
| Recording 5  | 8.953  | 25.886 | 41.055     |
| Recording 6  | 3.325  | 13.853 | 23.738     |
| Recording 7  | 9.766  | 9.453  | 20.340     |
| Recording 8  | 11.738 | 20.162 | 35.718     |
| Recording 9  | 10.963 | 17.345 | 23.229     |
| Recording 10 | 0.960  | 11.675 | 20.243     |
| Recording 11 | 13.587 | 15.746 | 43.191     |
| Mean         | 6.575  | 14.925 | 27.696     |
| Sem          | 1.374  | 2.156  | 2.813      |

| Thalamus     | AW     | REM    | REM-PHASIC |
|--------------|--------|--------|------------|
| Recording 1  | 4.203  | 16.864 | 28.199     |
| Recording 2  | 6.478  | 11.578 | 28.341     |
| Recording 3  | 4.756  | 6.839  | 18.806     |
| Recording 4  | 1.130  | 16.982 | 22.733     |
| Recording 5  | 4.285  | 14.098 | 23.239     |
| Recording 6  | 12.500 | 21.996 | 31.330     |
| Recording 7  | 4.817  | 8.958  | 23.627     |
| Recording 8  | 12.417 | 17.096 | 30.575     |
| Recording 9  | 6.447  | 11.911 | 18.111     |
| Recording 10 | -0.050 | 11.279 | 20.230     |
| Recording 11 | 9.907  | 15.870 | 36.385     |
| Mean         | 6.081  | 13.952 | 25.598     |
| Sem          | 1.238  | 1.309  | 1.750      |

| dHippocampus | AW     | REM    | REM-PHASIC |
|--------------|--------|--------|------------|
| Recording 1  | 0.520  | 23.790 | 39.739     |
| Recording 2  | 2.820  | 13.210 | 41.711     |
| Recording 3  | 4.125  | 4.231  | 26.929     |
| Recording 4  | 0.298  | 21.945 | 31.976     |
| Recording 5  | 5.848  | 23.223 | 38.773     |
| Recording 6  | 11.878 | 37.260 | 56.358     |
| Recording 7  | 8.347  | 12.161 | 33.920     |
| Recording 8  | 6.680  | 20.367 | 38.534     |
| Recording 9  | 10.780 | 29.013 | 43.598     |
| Recording 10 | 2.150  | 27.330 | 43.404     |
| Recording 11 | 15.452 | 31.793 | 70.070     |
| Mean         | 6.264  | 22.211 | 42.274     |
| Sem          | 1.486  | 2.865  | 3.591      |

| vHippocampus | AW     | REM    | REM-PHASIC |
|--------------|--------|--------|------------|
| Recording 1  | 0.214  | 0.341  | 1.505      |
| Recording 2  | 1.038  | 3.316  | 9.173      |
| Recording 3  | 1.143  | 4.272  | 15.275     |
| Recording 4  | 3.471  | 11.793 | 15.163     |
| Recording 5  | NaN    | NaN    | NaN        |
| Recording 6  | NaN    | NaN    | NaN        |
| Recording 7  | 3.952  | 9.985  | 23.396     |
| Recording 8  | 7.564  | 16.770 | 27.066     |
| Recording 9  | 3.672  | 23.218 | 31.314     |
| Recording 10 | -0.599 | 24.362 | 34.056     |
| Recording 11 | 6.834  | 17.744 | 38.646     |
| Mean         | 3.032  | 12.422 | 21.733     |
| Sem          | 0.860  | 2.629  | 3.712      |

### Supplementary Table 3: Details of vascular amplification for all diagonal recordings

For each recording, we computed the average CBV level in four regions including neocortex, ventral and dorsal hippocampus, and whole thalamus. The values displayed in Figure 2C are extracted from these tables. CBV units are expressed in % of change relative to the baseline.

| $\Delta t$   | # Surges | LFP       |           |            | CBV      |             |        |        |
|--------------|----------|-----------|-----------|------------|----------|-------------|--------|--------|
|              |          | Gamma-low | Gamma-mid | Gamma-high | Thalamus | Hippocampus | Cortex | Whole  |
| Recording 1  | 4        | 0.663     | 0.513     | 0.175      | 2.474    | 2.724       | 2.349  | 2.599  |
| Recording 2  | 9        | 0.875     | 0.743     | 0.206      | 2.564    | 2.508       | 3.397  | 2.731  |
| Recording 3  | 6        | 0.150     | 0.150     | -0.120     | 2.537    | 2.453       | 2.536  | 2.536  |
| Recording 4  | 5        | NaN       | 1.267     | 0.317      | 3.085    | 2.885       | 3.285  | 3.085  |
| Recording 5  | 2        | NaN       | -1.225    | -0.925     | 1.642    | 1.892       | 1.892  | 1.892  |
| Recording 6  | 1        | NaN       | NaN       | 0.000      | 2.202    | 2.202       | 3.202  | 1.702  |
| Recording 7  | 2        | NaN       | -2.300    | -1.100     | 1.428    | 1.178       | 0.428  | 0.428  |
| Recording 8  | 5        | 0.250     | 0.063     | -0.150     | 1.596    | 1.496       | 1.896  | 1.696  |
| Recording 9  | 9        | 1.963     | 0.557     | 0.600      | 1.931    | 1.931       | 2.155  | 2.099  |
| Recording 10 | 23       | -0.265    | 0.388     | 0.321      | 1.014    | 1.306       | 1.270  | 1.270  |
| Recording 11 | 13       | -0.475    | -0.258    | 0.268      | 0.970    | 1.067       | 1.003  | 0.906  |
| Recording 12 | 16       | 0.956     | 0.107     | 0.180      | 1.525    | 1.749       | 1.693  | 1.833  |
| Recording 13 | 27       | 0.543     | 0.490     | 0.475      | 1.382    | 1.581       | 1.647  | 1.514  |
| Recording 14 | 12       | 0.538     | 0.585     | 0.111      | 1.554    | 1.514       | 1.594  | 1.554  |
| Recording 15 | 18       | 1.370     | 0.900     | 0.320      | 1.302    | 1.595       | 1.408  | 1.541  |
| Recording 16 | 29       | 0.190     | 0.079     | 0.570      | 1.015    | 1.280       | 1.015  | 1.065  |
| Recording 17 | 17       | -0.196    | 0.368     | 0.156      | 1.036    | 1.149       | 1.459  | 1.374  |
| Recording 18 | 10       | -0.658    | -0.100    | -0.294     | 0.682    | 1.402       | 0.730  | 0.922  |
| Recording 19 | 8        | 1.317     | 0.767     | 0.392      | 1.590    | 1.710       | 2.009  | 1.830  |
| Recording 20 | 11       | -1.242    | 0.178     | -0.006     | 0.803    | 0.934       | 0.847  | 0.891  |
| Recording 21 | 13       | 0.550     | 1.136     | 0.367      | 1.338    | 1.485       | 1.596  | 1.485  |
| Recording 22 | 41       | 0.421     | -0.015    | 0.227      | 1.152    | 1.304       | 1.140  | 1.152  |
| Recording 23 | 20       | -0.208    | 0.426     | 0.308      | 0.850    | 0.946       | 1.354  | 1.114  |
| Recording 24 | 50       | 0.394     | 0.584     | 0.432      | 1.268    | 1.364       | 1.518  | 1.422  |
| Mean         |          | 0.3       | 0.34      | 0.281      | 1.303    | 1.458       | 1.493  | 1.438  |
| St-dev       |          | 1.655     | 1.39      | 1.084      | 1.16     | 1.206       | 1.272  | 1.195  |
| Z-score      |          | 3.402     | 4.579     | 4.854      | 21.056   | 22.653      | 21.985 | 22.539 |
| Sem (ms)     |          | 7.5       | 4.9       | 3.6        | 3.3      | 3.4         | 3.6    | 3.6    |

**Supplementary Table 4: Details of timings of LFP and CBV events relative to the peak of theta burst**

For each recording, we isolated 351 surges displaying a prominent peak in all three regions (cortex, dorsal hippocampus and thalamus). We extracted relative timing compared to the peak of theta activity preceding each vascular surge.

## Supplementary References

1. Kjonigsen, L. J., Lillehaug, S., Bjaalie, J. G., Witter, M. P. & Leergaard, T. B. Waxholm Space atlas of the rat brain hippocampal region: Three-dimensional delineations based on magnetic resonance and diffusion tensor imaging. *NeuroImage* **108**, 441–449 (2015).
2. Belluscio, M. A., Mizuseki, K., Schmidt, R., Kempter, R. & Buzsaki, G. Cross-Frequency Phase-Phase Coupling between Theta and Gamma Oscillations in the Hippocampus. *Journal of Neuroscience* **32**, 423–435 (2012).
3. Paxinos, G., Watson, C., Pennisi, M. & Toppole, A. Bregma, lambda and the interaural midpoint in stereotaxic surgery with rats of different sex, strain and weight. *Journal of Neuroscience Methods* **13**, 139–143 (1985).
4. Papp, E. A., Leergaard, T. B., Calabrese, E., Johnson, G. A. & Bjaalie, J. G. Waxholm Space atlas of the Sprague Dawley rat brain. *NeuroImage* **97**, 374–386 (2014).
